# Supplementary material for: The Evolution of Genomic Instability in the Obligate Endosymbionts of Whiteflies
Source: PubMed Central journal article supplement — Genome Biol Evol. 2013 Mar 29;5(5):783–93. doi: 10.1093/gbe/evt044 (PMC3673631; doi:10.1093/gbe/evt044), 2013-03-29
Supplement: supp_evt044_SI.pdf [file supp_evt044_SI.pdf]

## SUPPLEMENTARY INFORMATION

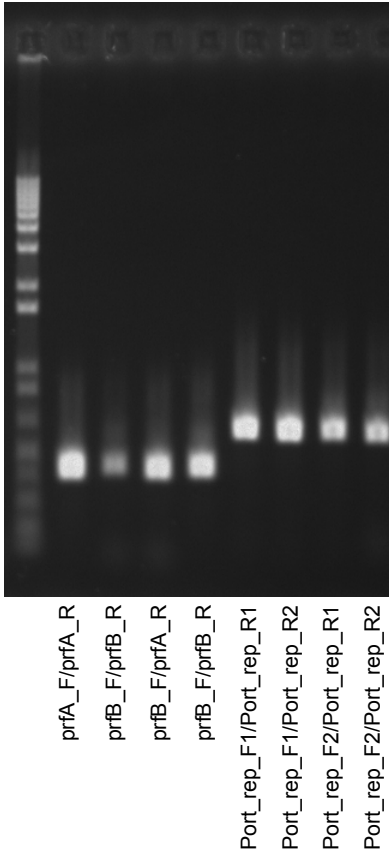

**Figure S1.** PCR-based evidence for the coexistence of alternative *Portiera* BT genome conformations in individual insects. DNA was extracted from a single *Bemisia tabaci* (biotype B) individual and successfully amplified with all four pairwise combinations of primers flanking the two sets of identical repeats found in the genome (see main text). Primer combinations are indicated below each lane and correspond to the sequences provided in Table S1.

**A. EcoRI Digest – *prfB* Probe**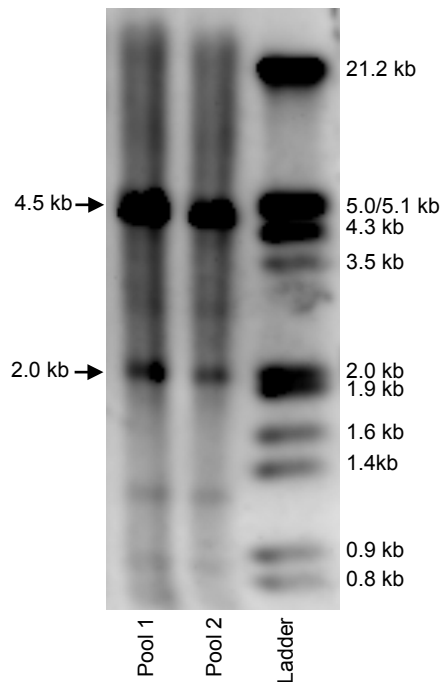**B. EcoRV/SpeI Digest – 6.5kb\_flank Probe**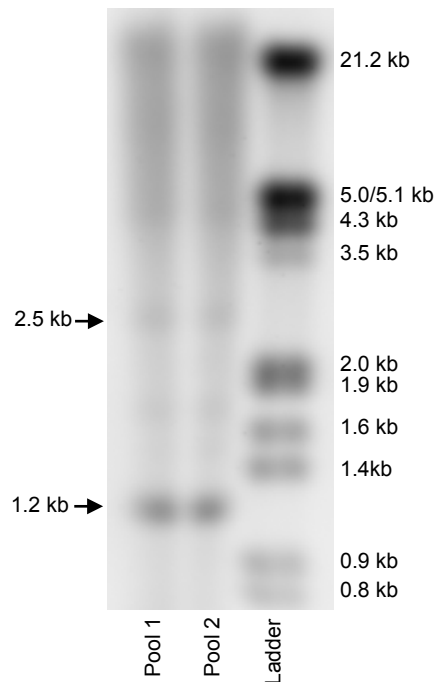**C. EcoRV Digest – 6.5kb Probe**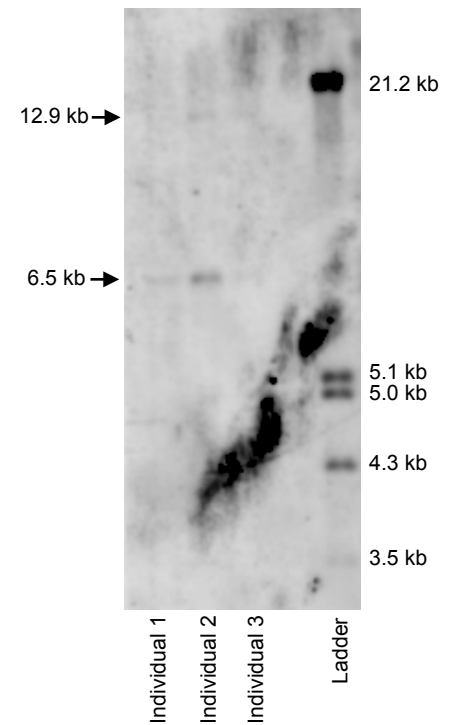

**Figure S2.** DNA gel blot hybridizations confirming the existence of alternative *Portiera* BT genome structures. (A) Hybridizing EcoRI digested DNA with a probe immediately upstream of *prfB* verified that this gene exists in its “normal” conformation (4.5 kb fragment) as well as a chimeric form (2.0 kb fragment) resulting from recombination with an identical repeat in *prfA*. (B) Hybridizing EcoRV/SpeI digested DNA with a probe outside of the 349 bp identical repeat sequence confirmed that chromosomes lacking any copies of the 6.5 kb sequence (1.2 kb fragment) were more abundant than chromosomes with one or more copies of this sequence (2.5 kb fragment). (C) Hybridizations generated with low concentration DNA extracted from individual whiteflies showed that the same EcoRV 6.5/12.9 kb structural polymorphism observed in pooled DNA samples (fig. 2) could also be detected within a single host insect.

**Table S1.** PCR Primer Sequences

| <b>Purpose</b>                                          | <b>Primer Name</b> | <b>Primer Sequence (5' to 3')</b> |
|---------------------------------------------------------|--------------------|-----------------------------------|
| PCR-based detection of alternative genome conformations | prfA_F             | CAGGTACACATCGAGTACAAAG            |
|                                                         | prfA_R             | CCTTGTGCAAAATTGTAAGTACG           |
|                                                         | prfB_F             | AAGGTATTCATCGCTTAGTTTCG           |
|                                                         | prfB_R             | CTTTTATTCTCTGAGCATCTAACAC         |
|                                                         | Port_rep_F1        | CCTTTATTTTTTCACAAAATCAAATAGCC     |
|                                                         | Port_rep_R1        | AAAAGTATCCAATAATATGTTTCAGC        |
|                                                         | Port_rep_F2        | AACATAAGACTTACACATACAGATAAC       |
|                                                         | Port_rep_R2        | GATGTTAATTTTTGCTTGTGTTCTG         |
| Amplification of probes for DNA gel blots               | 6.5kb_blot_F       | ATTGCCTATTGCCTCTTTCCTCT           |
|                                                         | 6.5kb_blot_R       | AAAAAGGGCTATTTGATTTTGTGA          |
|                                                         | 6.5kb_flank_blot_F | TTAACAATCAAATAACAGCAAAAA          |
|                                                         | 6.5kb_flank_blot_R | TGTATAATTCAATAACAACGAACATTT       |
|                                                         | prfB_blot_F        | CGGACATGCTGTGTTTATTTTTT           |
|                                                         | prfB_blot_R        | TTTCAGTACGCATCCATCCA              |
